# Supplementary material for: Local Sociostructural Predictors of COVID-19 Incidence in Germany
Source: Preprints.org preprint supplement (doi:10.20944/preprints202203.0213.v2), 2022-05-05

# Supplement S4 for the article ‘Local Sociostructural Predictors of COVID-19 Incidence in Germany’

Alisha I. Qamar, Leonie Gronwald, Nina Timmesfeld and Hans H. Diebner

2022-04-29

## Multicollinearity of the share of votes

The share of votes of all parties add up to 1. Taken as predictors in a regression analysis, this entails some degree of multicollinearity. However, the 411 German rural districts exhibit considerable heterogeneity in terms of popularity of parties expressed by their share of votes. A perfect multicollinearity would be present if and only if the coefficients of collinearity would be identical for all districts. However, the scatterplot shown in Figure-S4-1 below gives an impression of the existing heterogeneity, i.e., the pairwise correlations are moderate such that a regression analysis can still be meaningful.

A common procedure to assess the degree of multicollinearity is to drop one of the variables. We performed a corresponding sensitivity analysis with results shown in Table-S4-1 below. The table depicts the regression results of the full regression model (share of votes of all parties except “other parties” as predictors) and the results of five regression analyses each with one party left out from the set of predictors (except AfD). Leaving one party out leads to an approximately constant shift of the values of the regression parameters of the remaining predictors, whereby the magnitude of the observed shift depends on the omitted party. The observation of such a bias in moderately collinear predictors is a known phenomenon, consequently, as mentioned in the main text, the estimates have to be interpreted in a relative sense. Inferences drawn from these results are unchanged when being compared with the inferences drawn from the full model.

The result of the aforementioned sensitivity analysis can visually quickly be comprehended by throwing a glance onto the forest plot in Figure-S4-2. The relative positions of the CIs within each given model (full model and 5 models with one party dropped) remain approximately invariant.

### Figure-S4-1:

**Pairwise scatterplots of the share of votes per rural district.** The share of votes of all parties add up to 1. Taken as predictors in a regression analysis, this entails multi-collinearity. However, within the given context, pairwise correlations are moderate such that a regression still yields meaningful results (cf. Table-S4-1 below for details). The blue dots correspond to rural districts located in East Germany, whereas the green dots correspond to districts in West Germany.

Pairwise scatterplots of share of votes

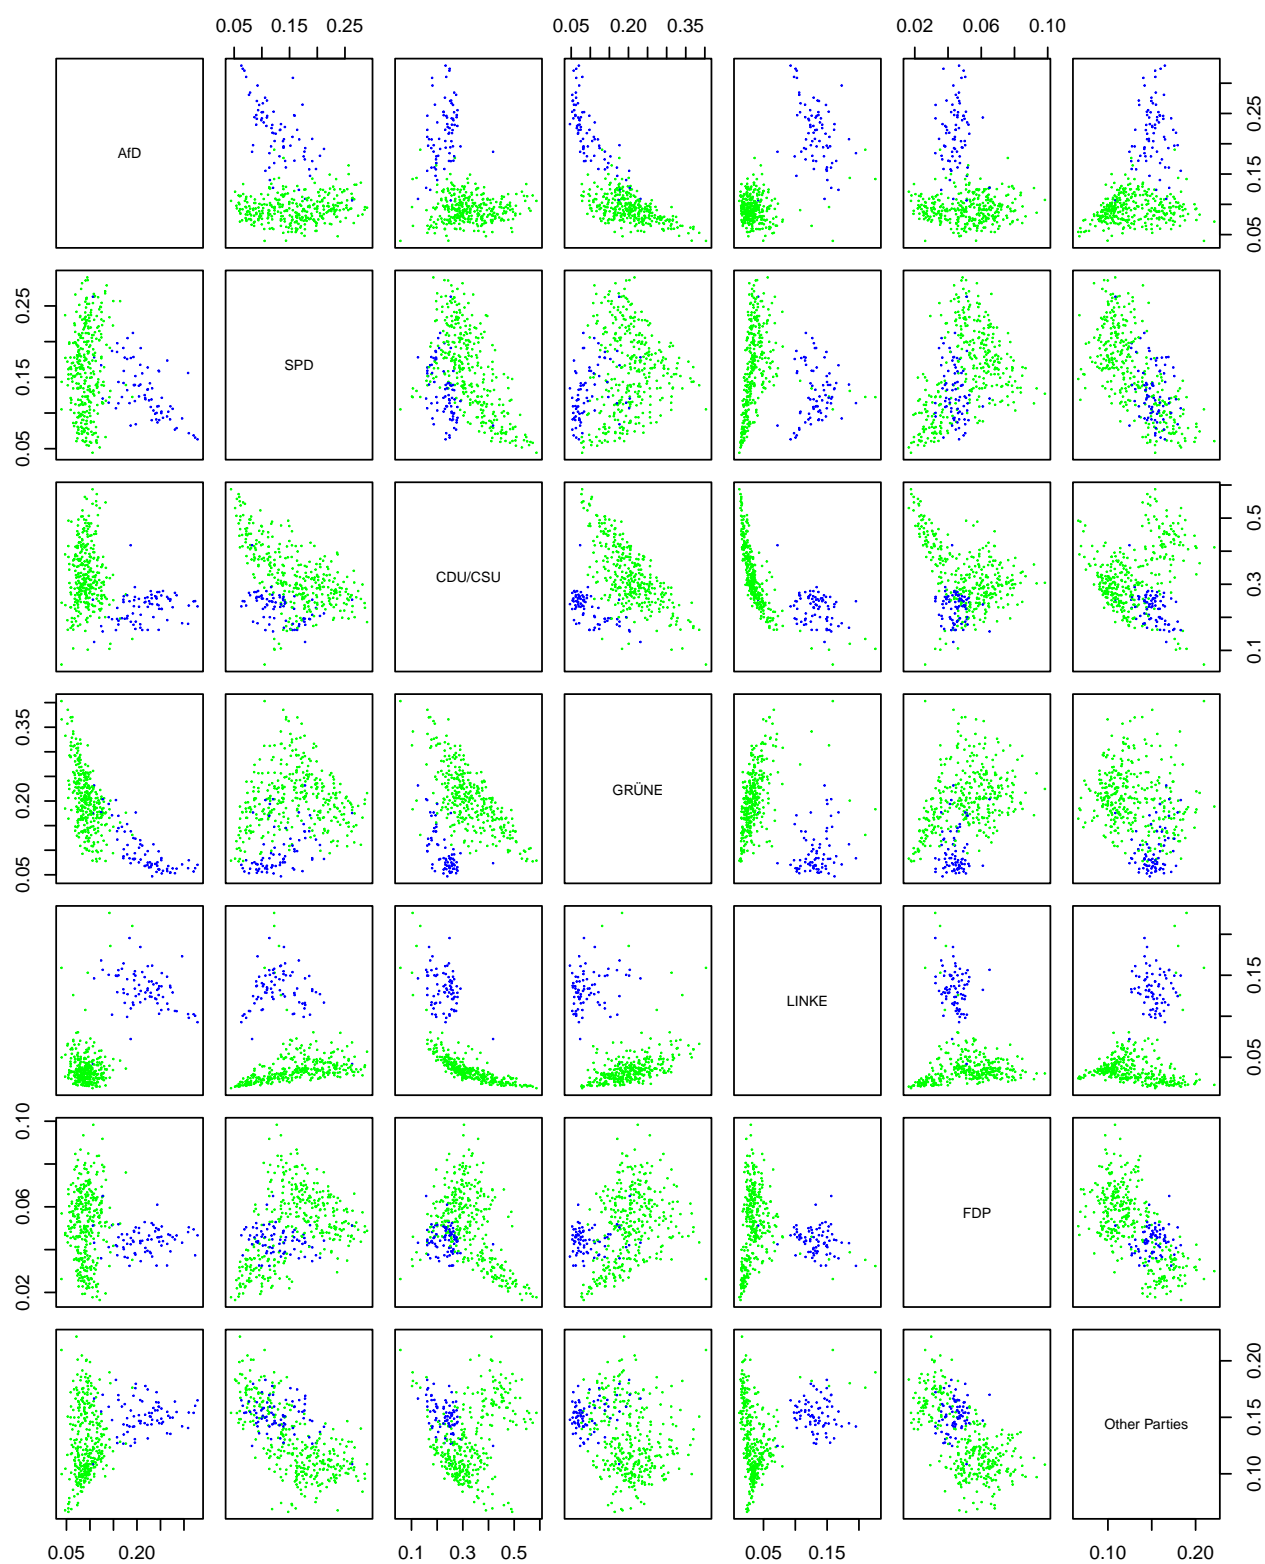

### Table-S4-1:

**Results of a sensitivity analysis by means of ‘leave one party out’.** The table depicts the regression results (the  $\beta$ -estimates and  $p$ -values) of the full regression model (share of votes of all parties except “other parties” as predictors) and the results of five regression analyses each with one party left out from the set of predictors (except AfD). The denotations of the predictors in the first column are the same as used in Table 2 of the main text and mostly intuitive, whereby the final 6 rows correspond to the party’s share of votes. The first two (numeric) columns refer to the full model output. The third and fourth columns belongs to the model with the share of vote of the SPD left out. Since SPD has the strongest negative correlation with AfD, all estimates are shifted by roughly 50 towards higher values. This shift is more or less absorbed by the intercept. All inferences drawn from these results are unchanged when being compared with the inferences drawn from full model. Consequently, as mentioned in the main text, the estimates have to be interpreted in a relative sense. The same holds for all other parties left out as well as can be read from the corresponding columns. Note,  $p$ -values with  $p = 0.000$  have to be interpreted as  $p < 0.0005$ .

|                    | Value    | p-value | Value     | p-value | Value    | p-value | Value    | p-value | Value     | p-value | Value     | p-value |
|--------------------|----------|---------|-----------|---------|----------|---------|----------|---------|-----------|---------|-----------|---------|
| (Intercept)        | 3286.174 | 0.142   | -1592.085 | 0.268   | 3523.989 | 0.014   | 3856.623 | 0.016   | -2729.525 | 0.081   | 1273.098  | 0.555   |
| Berlin             | -75.942  | 0.767   | -300.705  | 0.221   | -66.644  | 0.787   | -60.692  | 0.810   | -543.054  | 0.017   | -349.634  | 0.148   |
| Brandenburg        | 350.727  | 0.220   | 80.554    | 0.767   | 358.989  | 0.199   | 370.582  | 0.187   | -246.126  | 0.304   | 23.102    | 0.931   |
| BLBremen           | 545.600  | 0.178   | 70.886    | 0.849   | 561.816  | 0.147   | 583.093  | 0.137   | -10.454   | 0.978   | 168.855   | 0.664   |
| BW                 | 238.576  | 0.176   | 0.961     | 0.995   | 247.815  | 0.128   | 267.888  | 0.087   | -56.839   | 0.721   | -147.100  | 0.226   |
| Hamburg            | 152.558  | 0.768   | -228.148  | 0.651   | 166.509  | 0.742   | 187.190  | 0.712   | -303.116  | 0.552   | -197.686  | 0.698   |
| Hessen             | 18.447   | 0.930   | -316.953  | 0.068   | 29.870   | 0.876   | 53.511   | 0.773   | -373.992  | 0.041   | -390.522  | 0.015   |
| MV                 | -266.537 | 0.377   | -633.003  | 0.022   | -252.740 | 0.374   | -236.840 | 0.414   | -990.465  | 0.000   | -620.130  | 0.027   |
| Niedersachsen      | -167.370 | 0.417   | -608.543  | 0.000   | -151.302 | 0.374   | -124.010 | 0.460   | -619.203  | 0.000   | -491.300  | 0.006   |
| NRW                | 318.481  | 0.120   | -74.437   | 0.623   | 332.948  | 0.059   | 353.890  | 0.050   | -127.585  | 0.448   | -122.419  | 0.395   |
| RP                 | 218.997  | 0.261   | -93.512   | 0.564   | 228.178  | 0.213   | 237.091  | 0.209   | -84.885   | 0.636   | -97.865   | 0.554   |
| SA                 | 365.778  | 0.241   | 137.232   | 0.652   | 374.763  | 0.219   | 385.086  | 0.210   | -301.065  | 0.244   | -37.255   | 0.896   |
| Saarland           | 705.270  | 0.020   | 291.416   | 0.274   | 718.801  | 0.012   | 726.343  | 0.014   | 222.935   | 0.420   | 481.595   | 0.103   |
| Sachsen            | 1145.473 | 0.000   | 937.941   | 0.003   | 1155.134 | 0.000   | 1169.463 | 0.000   | 581.822   | 0.041   | 853.701   | 0.006   |
| SH                 | -851.891 | 0.000   | -1218.072 | 0.000   | -837.050 | 0.000   | -802.299 | 0.000   | -1238.142 | 0.000   | -1229.171 | 0.000   |
| Thüringen          | 985.378  | 0.002   | 693.087   | 0.019   | 998.222  | 0.001   | 1013.033 | 0.001   | 243.242   | 0.308   | 631.983   | 0.029   |
| juveniles          | 839.001  | 0.000   | 839.001   | 0.000   | 839.001  | 0.000   | 839.001  | 0.000   | 839.001   | 0.000   | 839.001   | 0.000   |
| adults             | -239.226 | 0.000   | -239.226  | 0.000   | -239.226 | 0.000   | -239.226 | 0.000   | -239.226  | 0.000   | -239.226  | 0.000   |
| period [61-80]     | -374.344 | 0.000   | -374.344  | 0.000   | -374.344 | 0.000   | -374.344 | 0.000   | -374.344  | 0.000   | -374.344  | 0.000   |
| period [81-100]    | 1217.538 | 0.000   | 1217.538  | 0.000   | 1217.538 | 0.000   | 1217.538 | 0.000   | 1217.538  | 0.000   | 1217.538  | 0.000   |
| lower edu          | 23.084   | 0.177   | 27.185    | 0.114   | 23.030   | 0.178   | 22.911   | 0.180   | 32.530    | 0.059   | 26.475    | 0.125   |
| middle edu         | 12.294   | 0.409   | 15.281    | 0.308   | 12.301   | 0.408   | 12.305   | 0.408   | 20.174    | 0.178   | 13.494    | 0.369   |
| higher edu         | 15.196   | 0.298   | 17.425    | 0.237   | 15.221   | 0.297   | 15.492   | 0.288   | 21.822    | 0.139   | 15.562    | 0.292   |
| density            | 0.312    | 0.000   | 0.323     | 0.000   | 0.311    | 0.000   | 0.314    | 0.000   | 0.309     | 0.000   | 0.300     | 0.000   |
| vote participation | -39.023  | 0.000   | -35.344   | 0.000   | -39.154  | 0.000   | -38.944  | 0.000   | -34.803   | 0.000   | -40.971   | 0.000   |
| AfD                | 101.449  | 0.000   | 159.824   | 0.000   | 98.328   | 0.000   | 92.869   | 0.000   | 166.607   | 0.000   | 122.640   | 0.000   |
| SPD                | -58.548  | 0.005   | NA        | NA      | -61.136  | 0.000   | -64.769  | 0.000   | -0.452    | 0.974   | -36.541   | 0.063   |
| CDU                | 2.694    | 0.890   | 52.317    | 0.000   | NA       | NA      | -3.697   | 0.657   | 60.176    | 0.000   | 22.433    | 0.226   |
| GRÜNE              | 8.521    | 0.717   | 63.367    | 0.000   | 5.583    | 0.578   | NA       | NA      | 68.338    | 0.000   | 29.344    | 0.196   |
| LINKE              | -107.939 | 0.000   | -45.385   | 0.019   | -111.167 | 0.000   | -115.245 | 0.000   | NA        | NA      | -68.011   | 0.010   |
| FDP                | -100.145 | 0.003   | -66.730   | 0.035   | -101.708 | 0.001   | -103.731 | 0.001   | -43.840   | 0.148   | NA        | NA      |

### Figure-S4-2:

**Forest plot showing the 95% confidence intervals (CIs) for the estimates corresponding to the party's share of votes.** The upper panel contains CIs of the full model (all parties except 'Other parties'). The remaining panels contain CIs from models where one party has been dropped from the list of predictors ('leave one party out'). Obviously, the relative positions of the CIs within each given model remain approximately invariant.

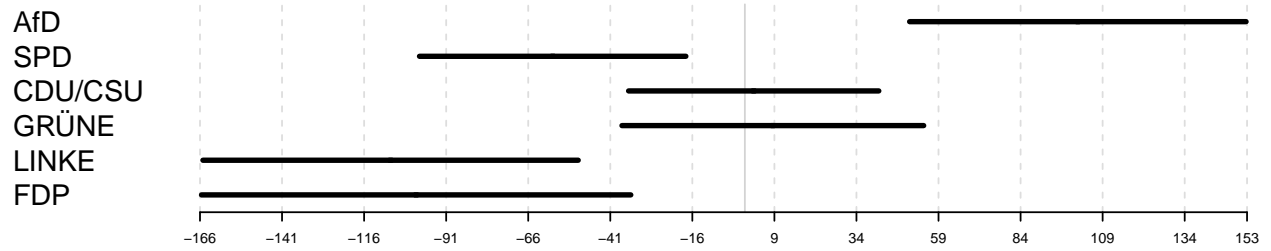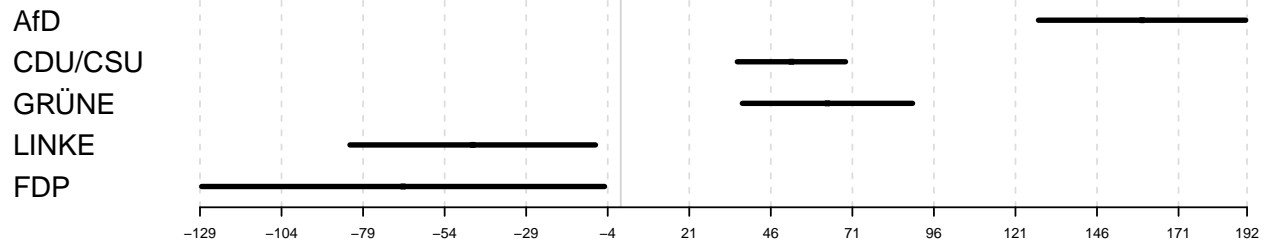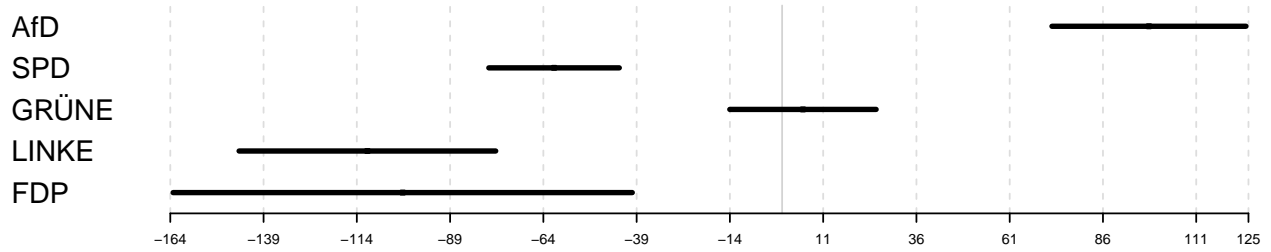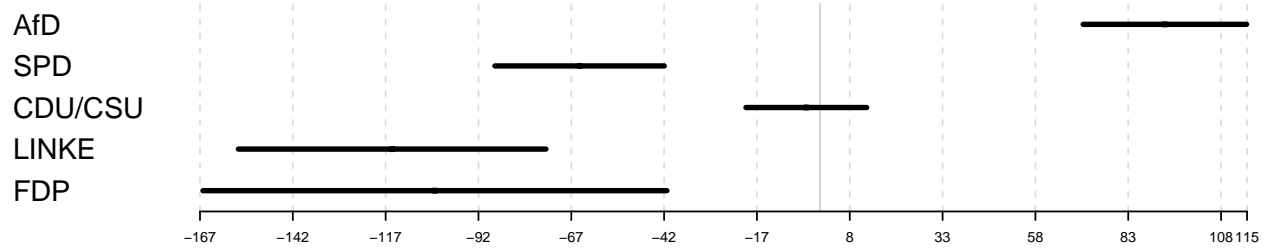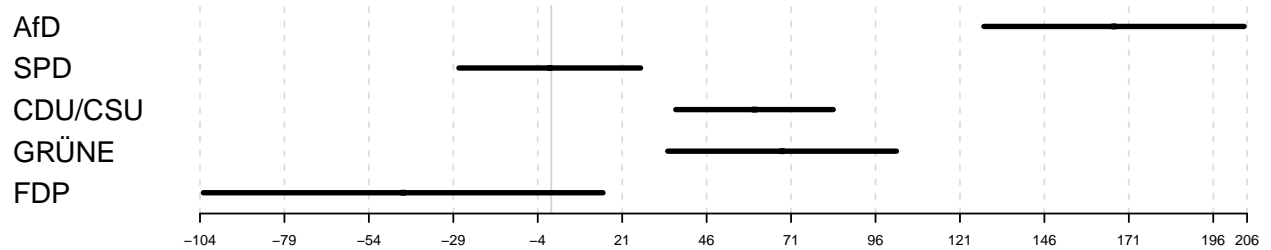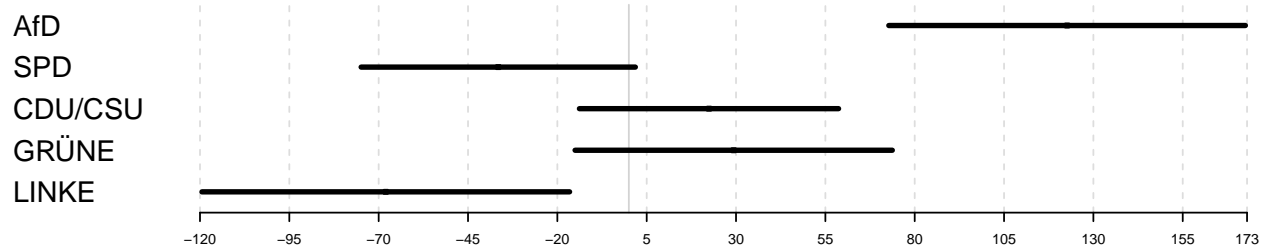

Supplement: Supplementary file [file supplementary]
