# Supplementary material for: Local Sociostructural Predictors of COVID-19 Incidence in Germany
Source: Preprints.org preprint supplement (doi:10.20944/preprints202203.0213.v2), 2022-05-05

## Supplement S1 to:

### **Alisha I. Qamar, Leonie Gronwald, Nina Timmesfeld, and Hans H. Diebner: Local Sociostructural Predictors of COVID-19 Incidence in Germany**

The following series of figures shows age-stratified (3 age classes, *age*) locally observed **maximum** incidences of 3 pre-defined epidemic periods (*p*) versus the share of vote (2019 European Parliament election) of 7 political parties and voter participation (*party*), respectively. Specifically, each panel depicts a scatterplot of maximum incidence for a pair [*p*, *age*] by share of vote of a selected *party* for 411 German rural districts. Data points corresponding to East German districts are depicted in blue, West German districts in green. Three linear regression lines are shown for the full set of points (black), only the East German (blue), and only the West German (green) parts, respectively.

The header of each page contains the given pair [*p*, *age*], 9 in total, and each panel is labeled by the name of the selected *party*.

Max. Incidence (kids) vs share of vote for period [41-60]

AfD

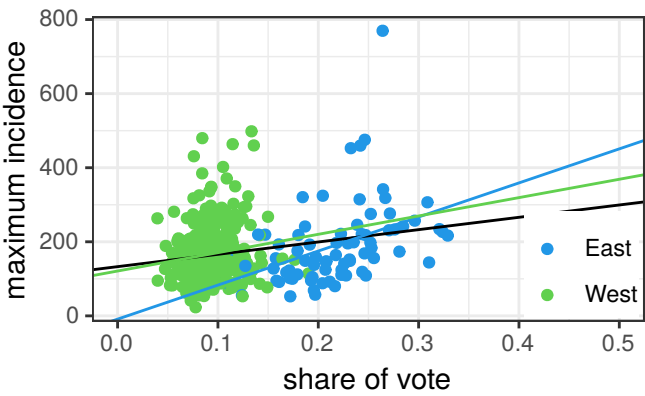

SPD

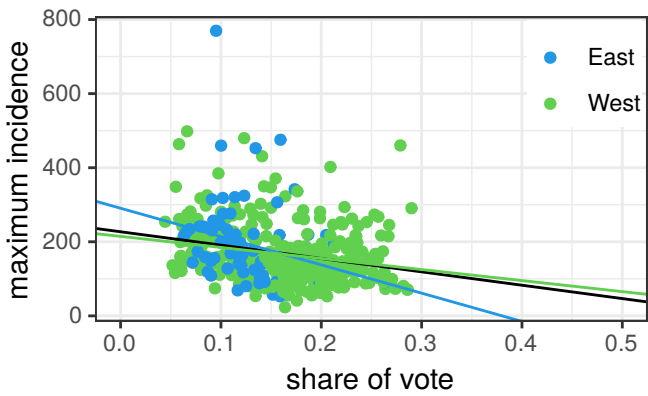

CDU/CSU

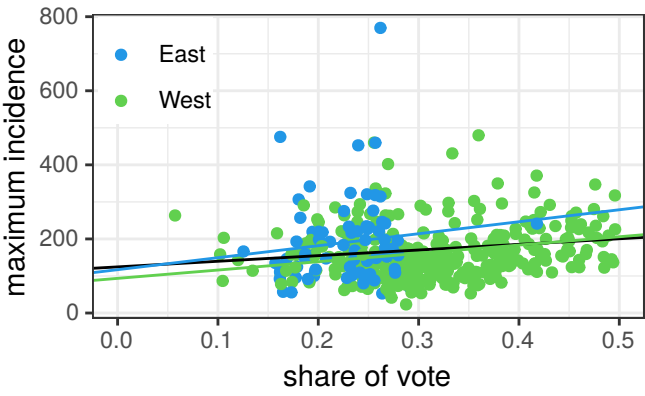

GRÜNE

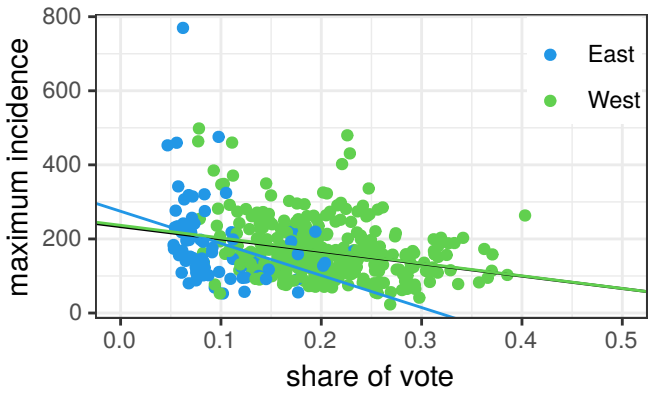

DIE LINKE

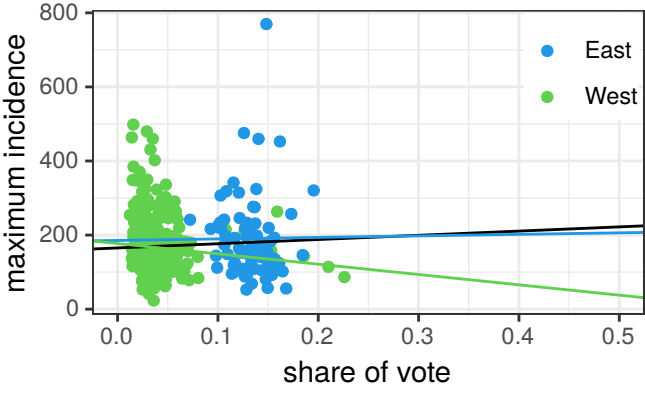

FDP

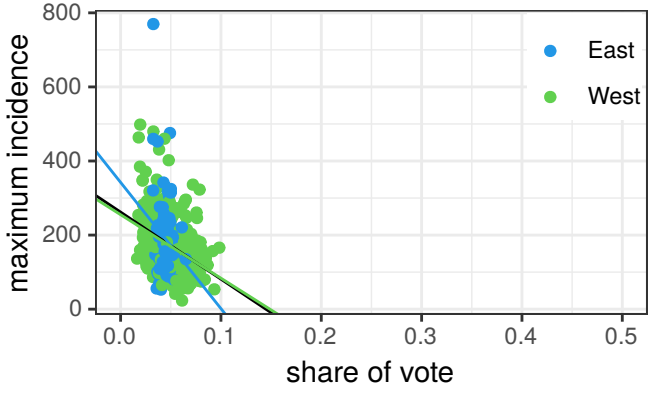

Other Parties

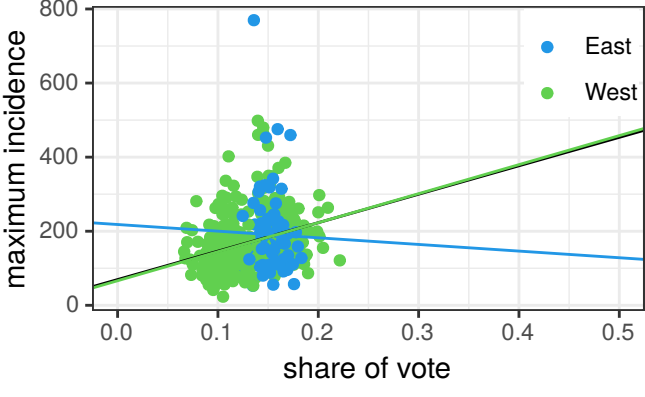

Voter Participation

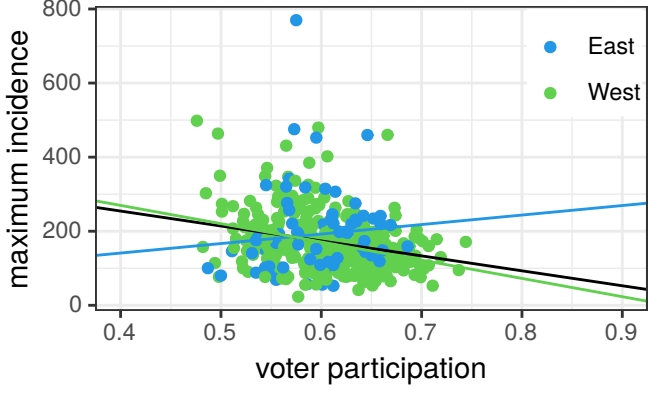

# Max. Incidence (juveniles) vs share of vote for period [41-60]

## AfD

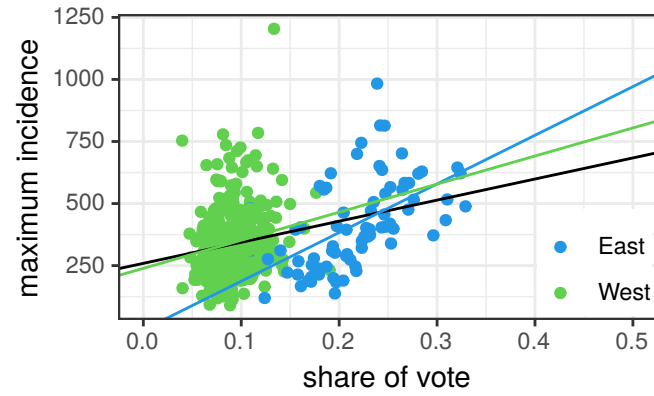

## SPD

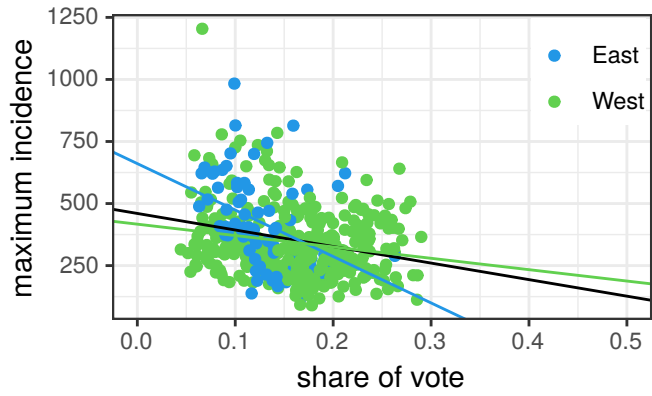

## CDU/CSU

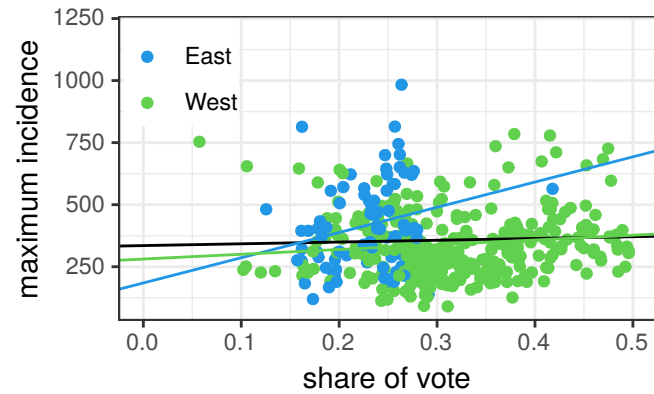

## GRÜNE

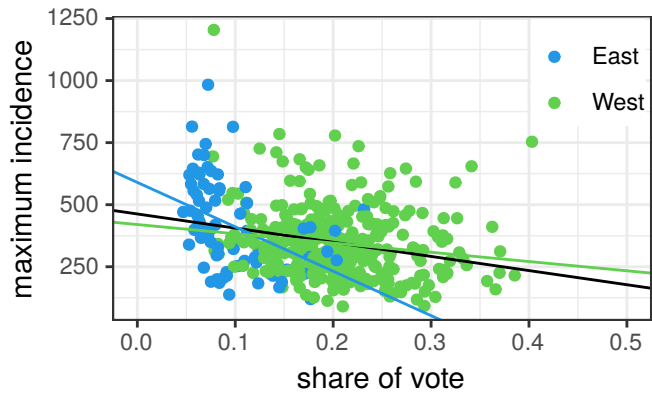

## DIE LINKE

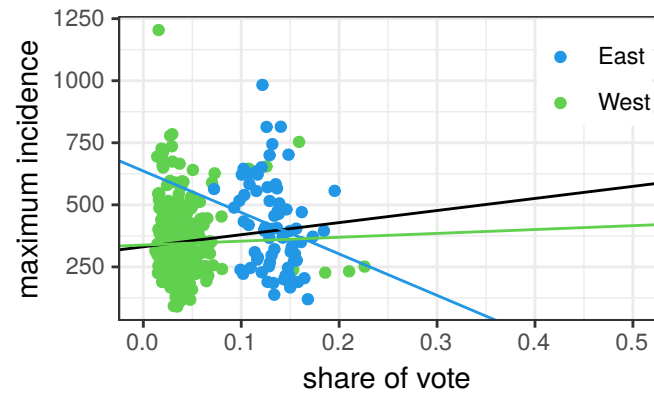

## FDP

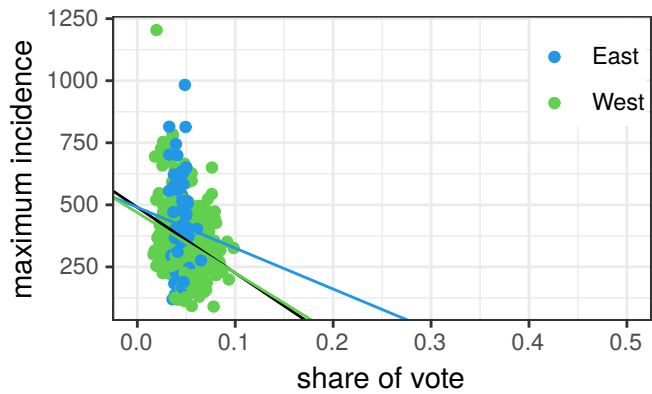

## Other Parties

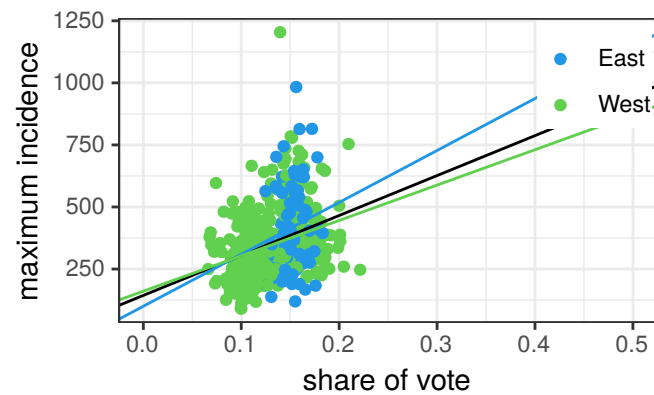

## Voter Participation

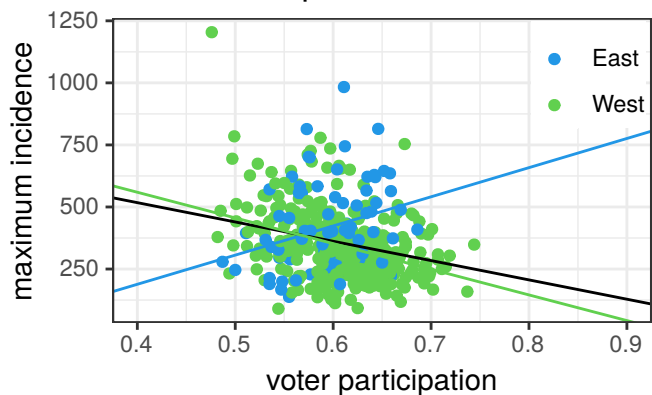

# Max. Incidence (adults) vs share of vote for period [41-60]

## AfD

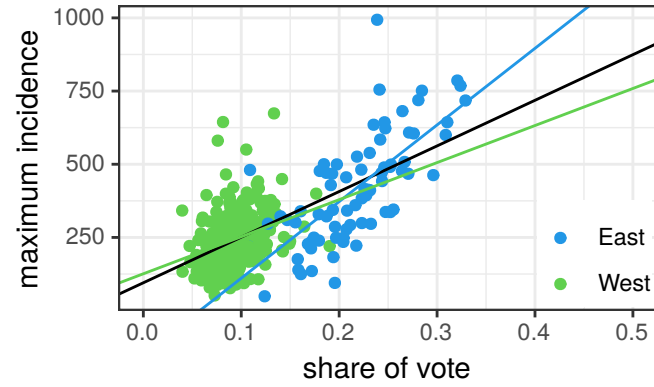

## SPD

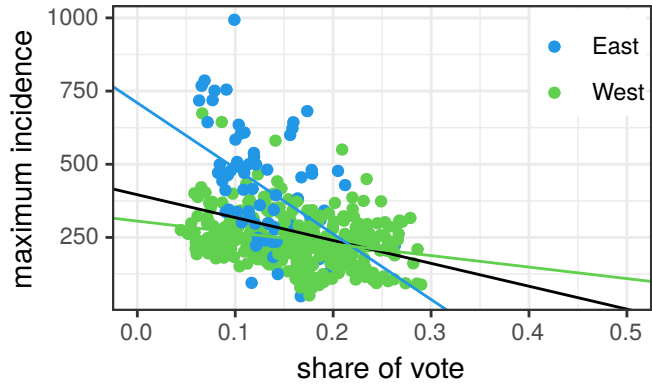

## CDU/CSU

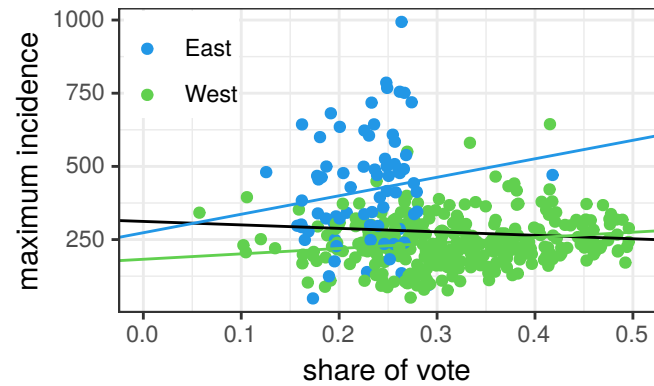

## GRÜNE

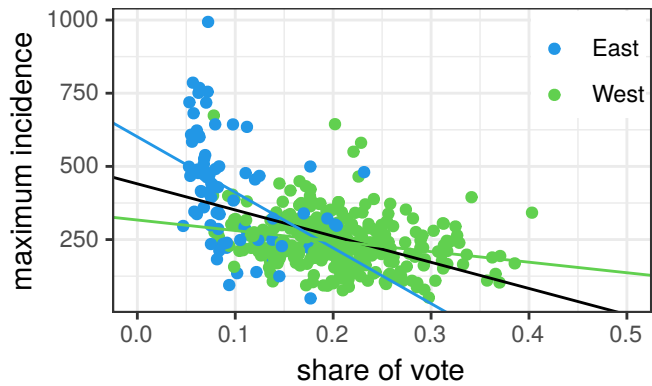

## DIE LINKE

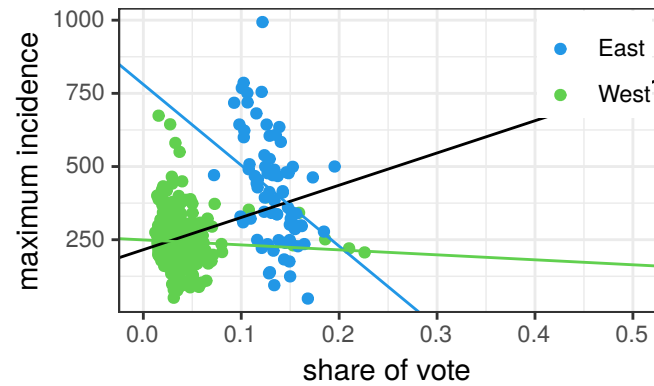

## FDP

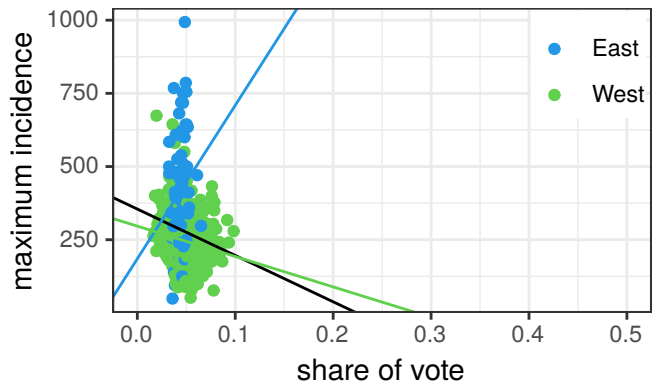

## Other Parties

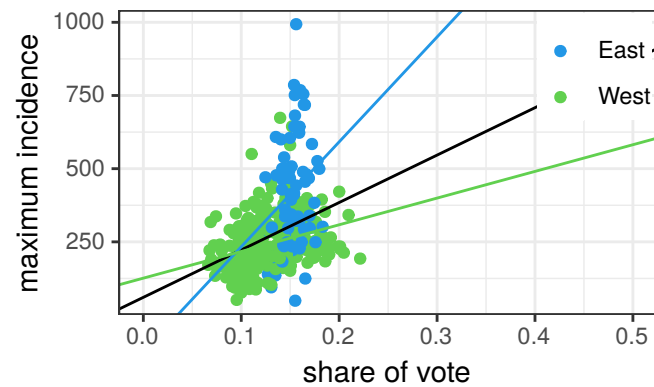

## Voter Participation

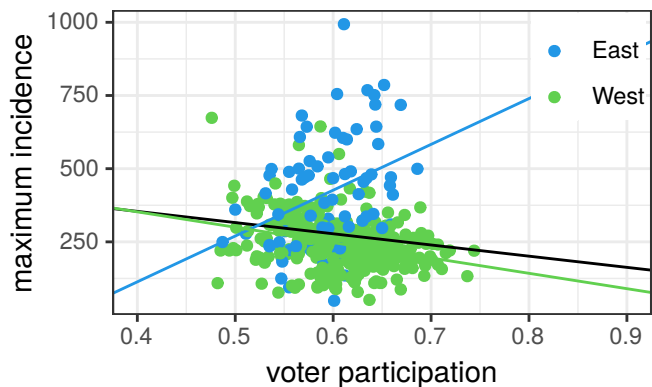

# Max. Incidence (kids) vs share of vote for period [61-80]

AfD

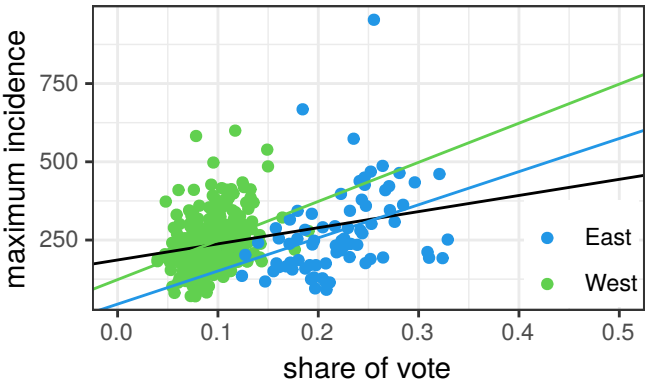

SPD

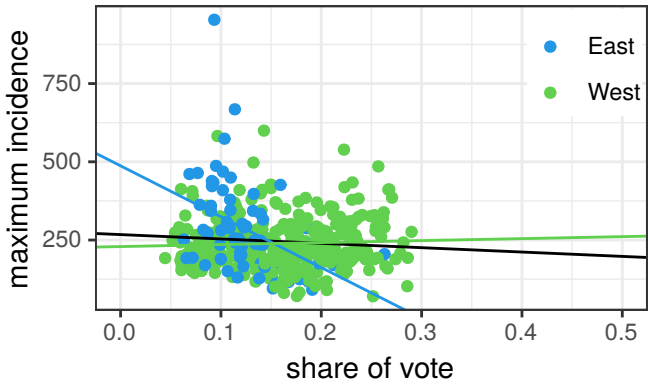

CDU/CSU

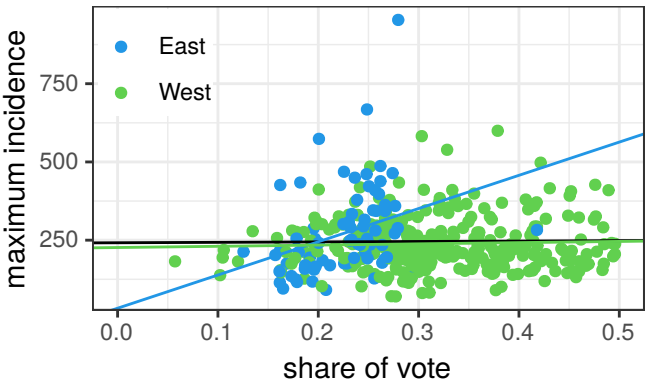

GRÜNE

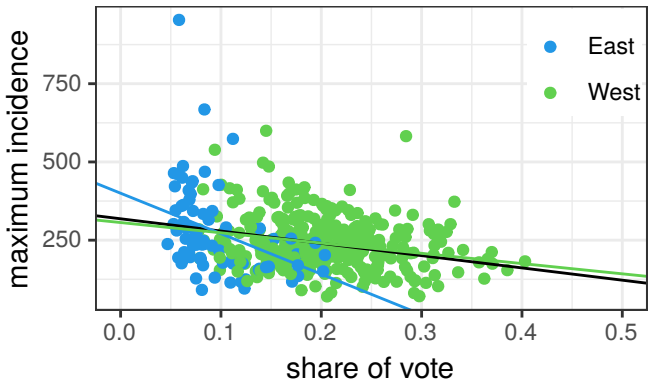

DIE LINKE

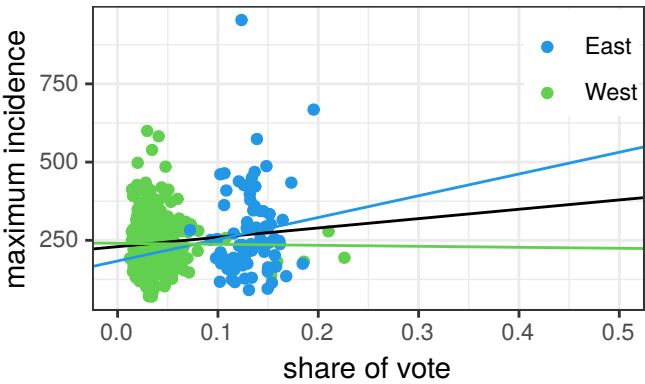

FDP

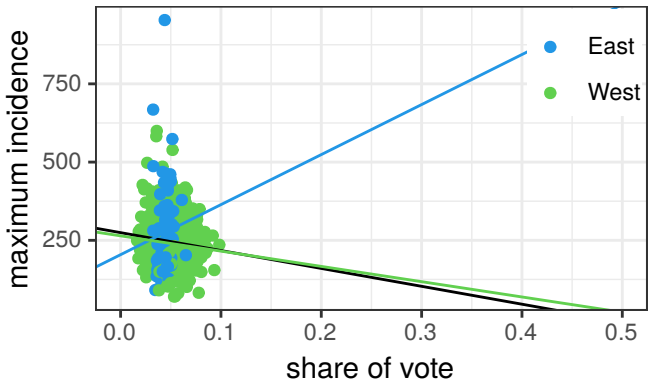

Other Parties

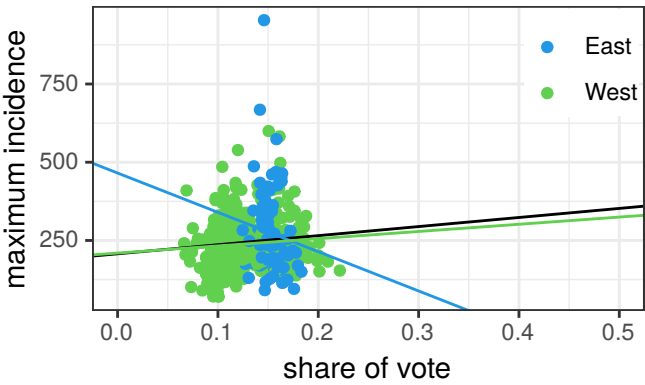

Voter Participation

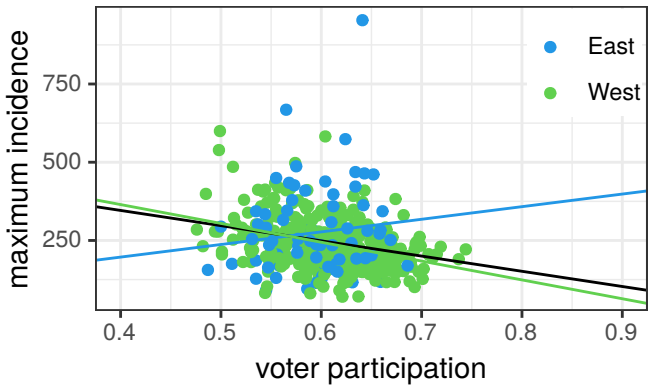

# Max. Incidence (juveniles) vs share of vote for period [61-80]

## AfD

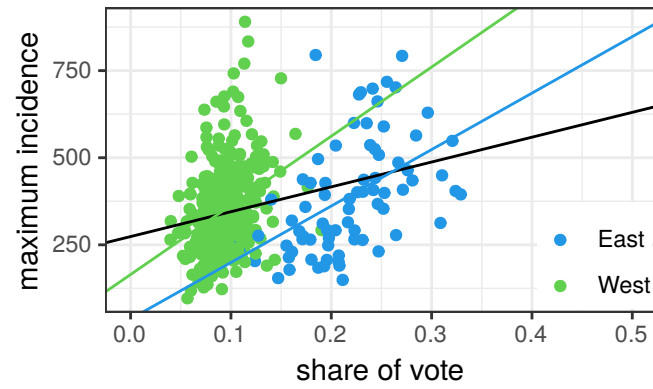

## SPD

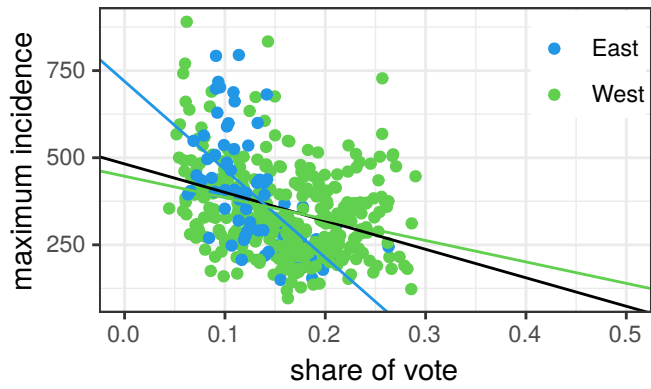

## CDU/CSU

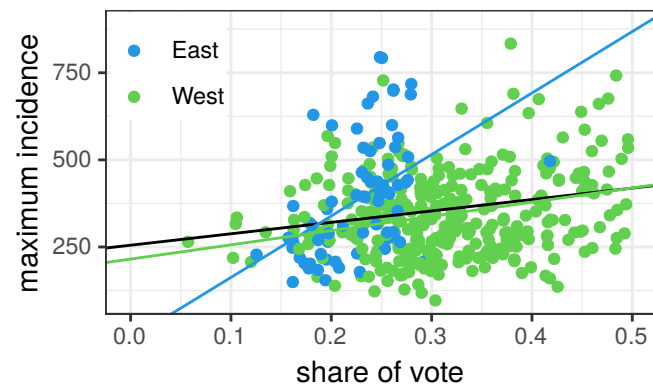

## GRÜNE

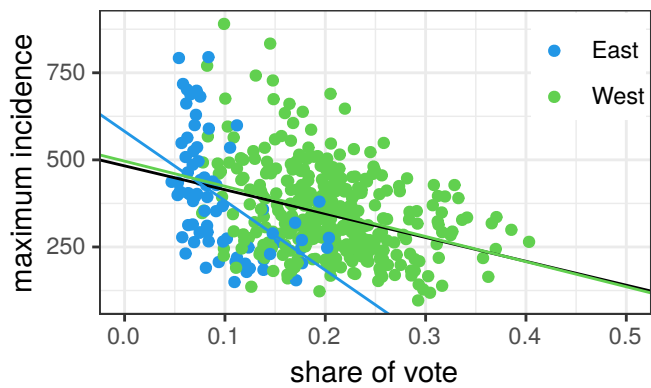

## DIE LINKE

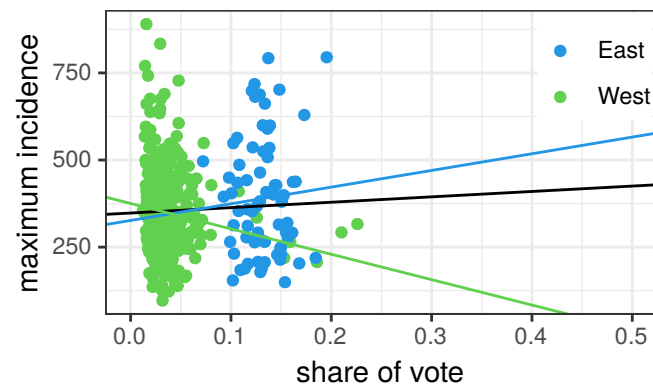

## FDP

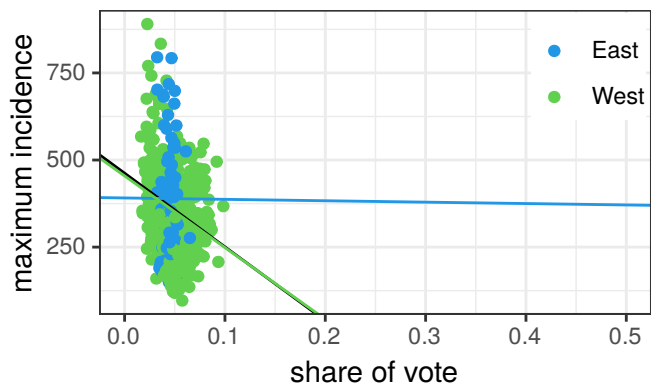

## Other Parties

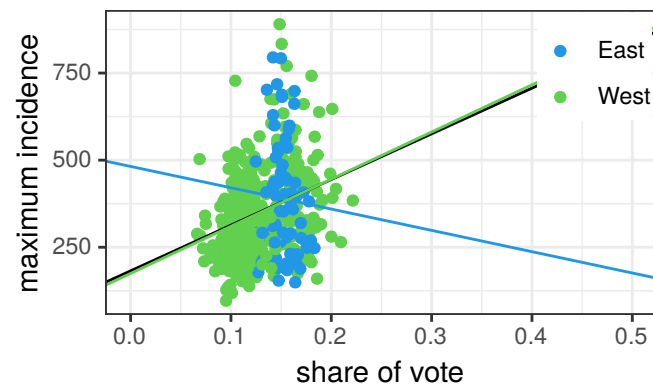

## Voter Participation

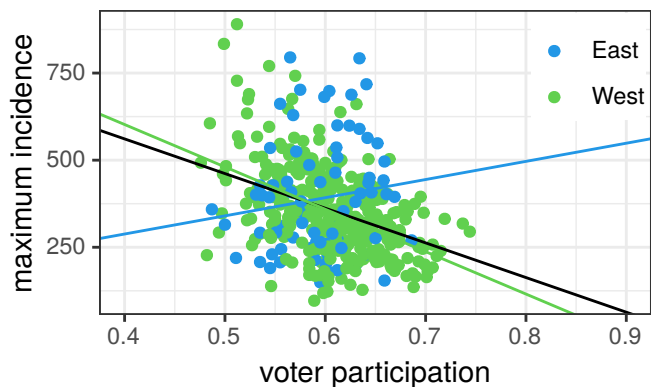

# Max. Incidence (adults) vs share of vote for period [61-80]

## AfD

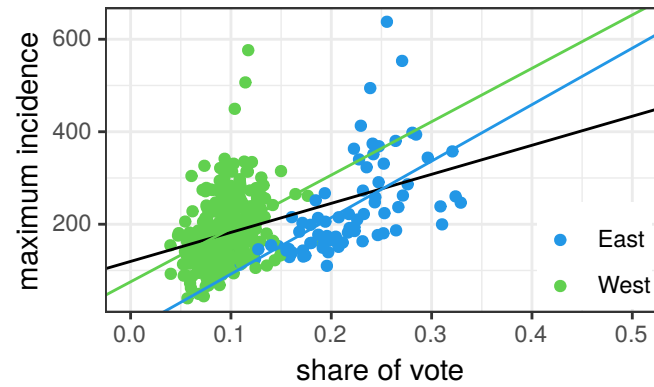

## SPD

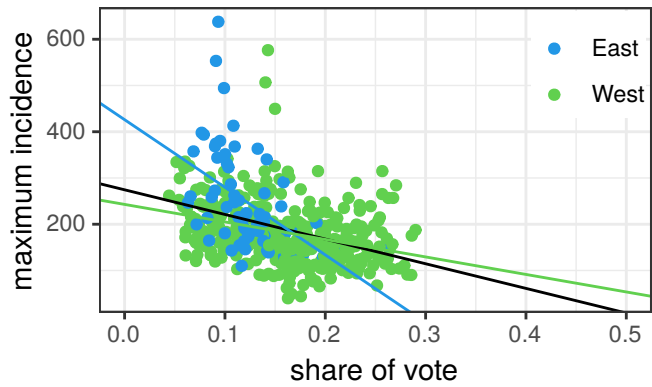

## CDU/CSU

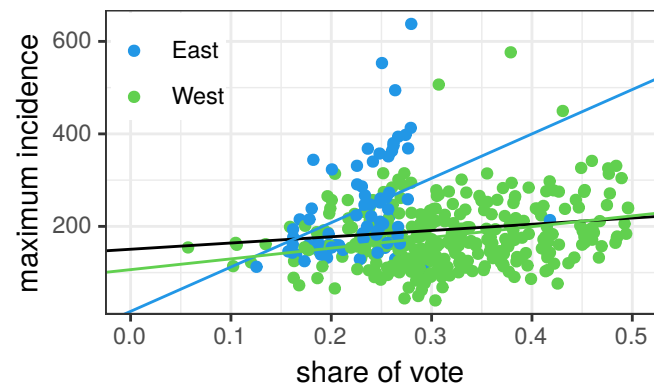

## GRÜNE

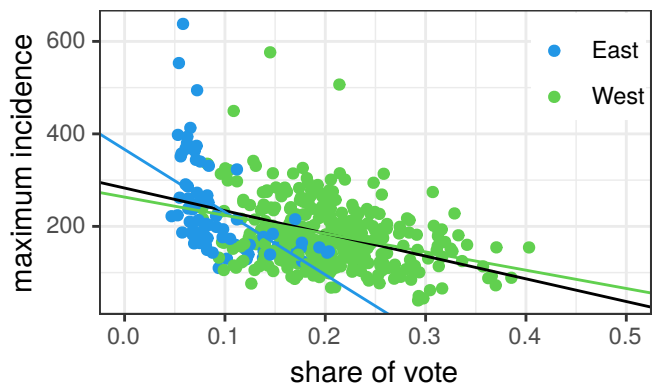

## DIE LINKE

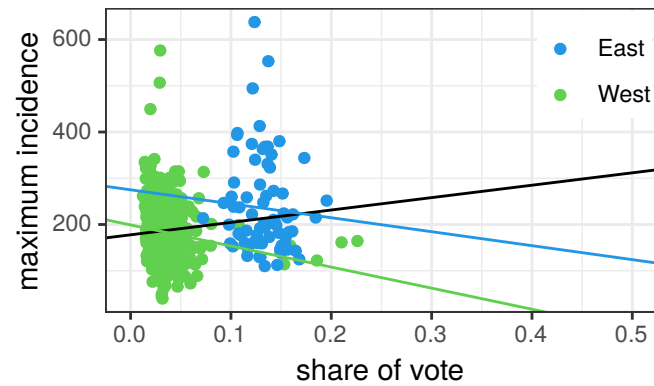

## FDP

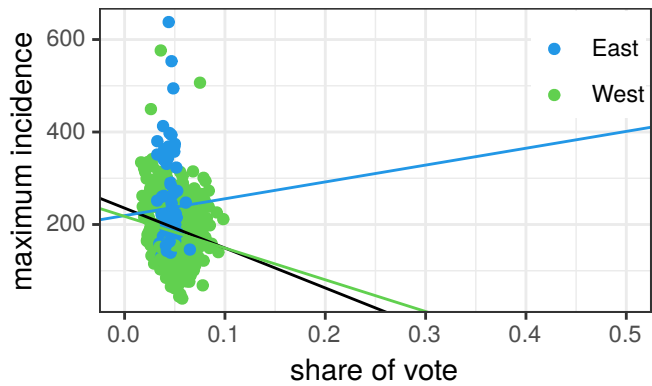

## Other Parties

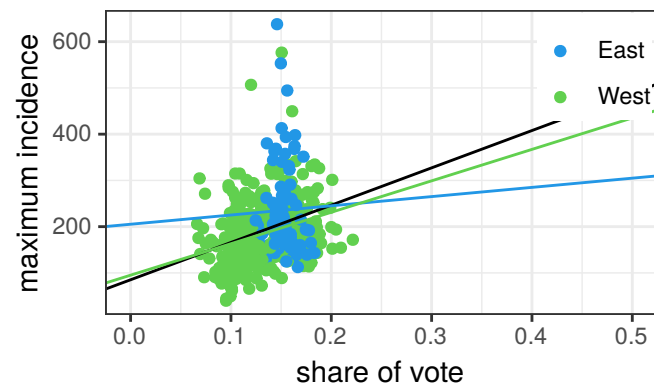

## Voter Participation

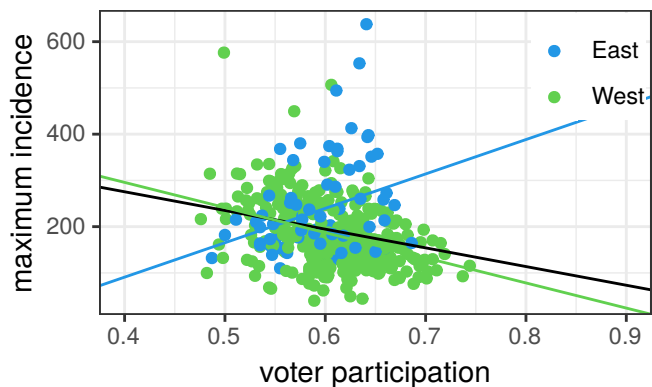

# Max. Incidence (kids) vs share of vote for period [81-100]

## AfD

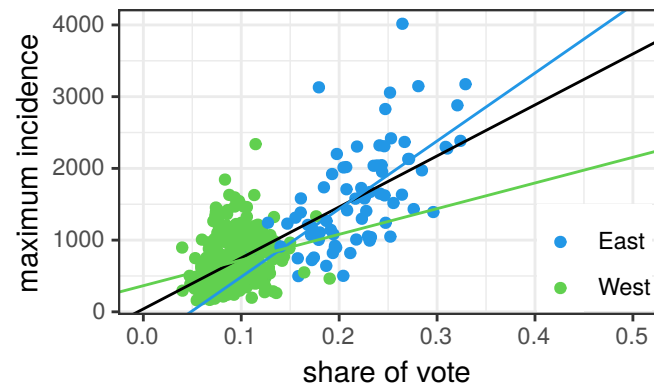

## SPD

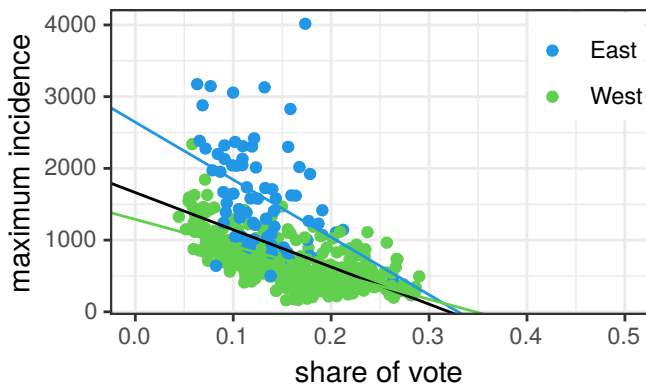

## CDU/CSU

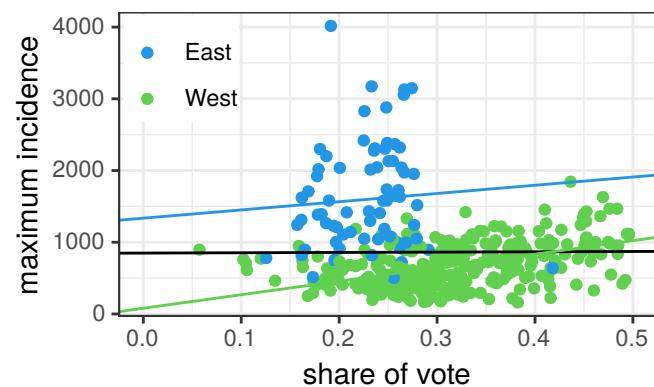

## GRÜNE

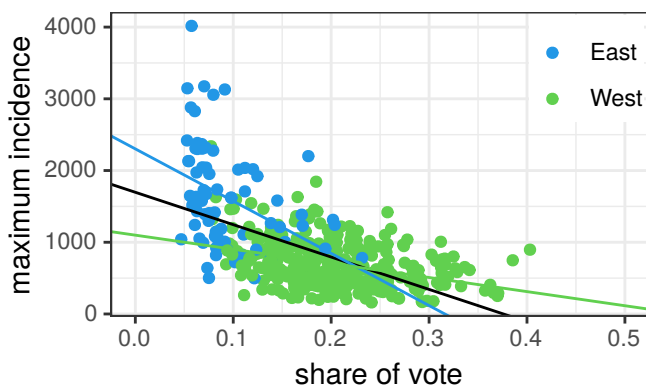

## DIE LINKE

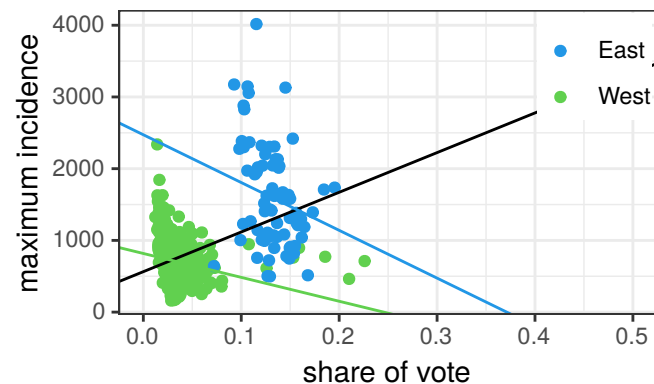

## FDP

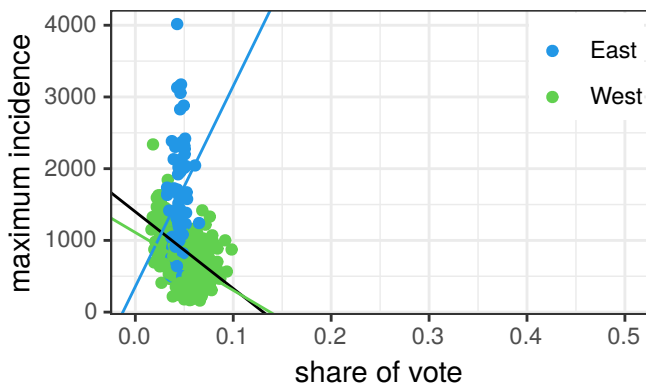

## Other Parties

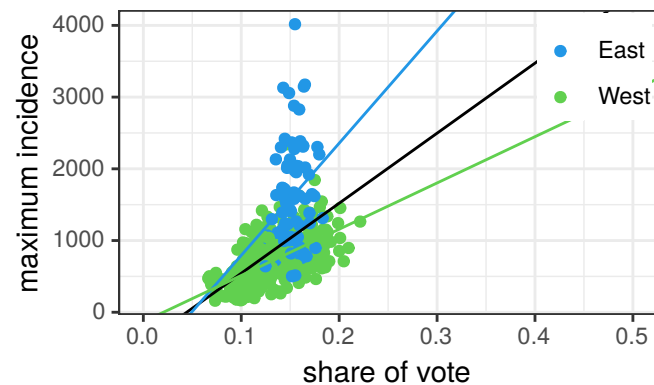

## Voter Participation

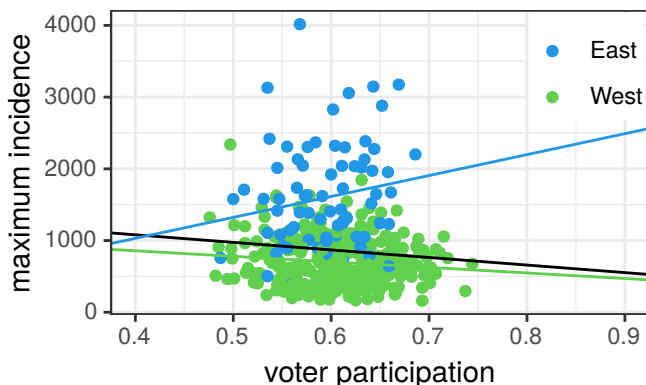

# Max. Incidence (juveniles) vs share of vote for period [81-100]

## AfD

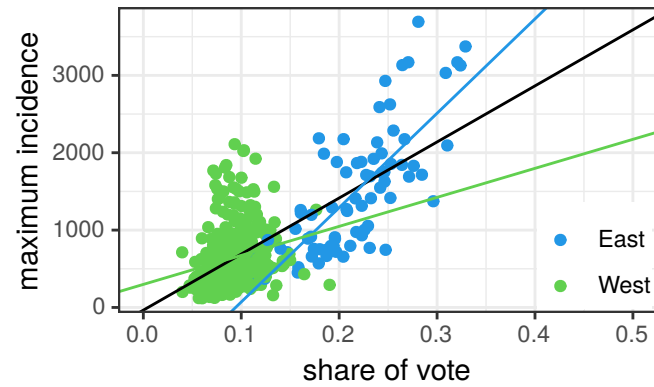

## SPD

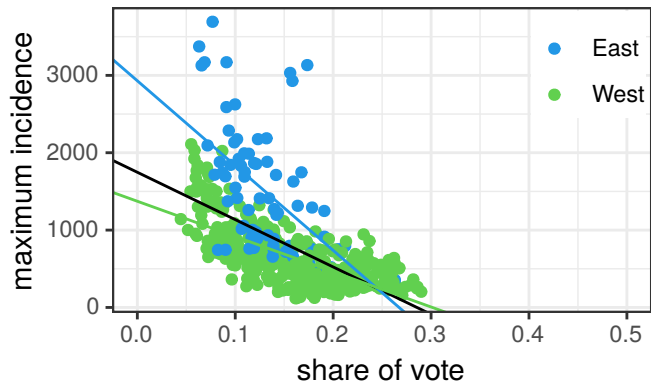

## CDU/CSU

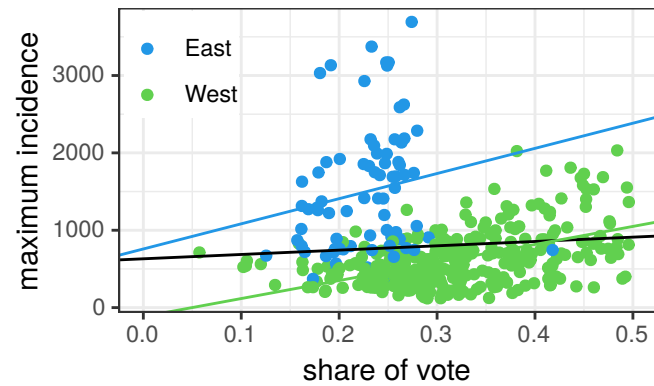

## GRÜNE

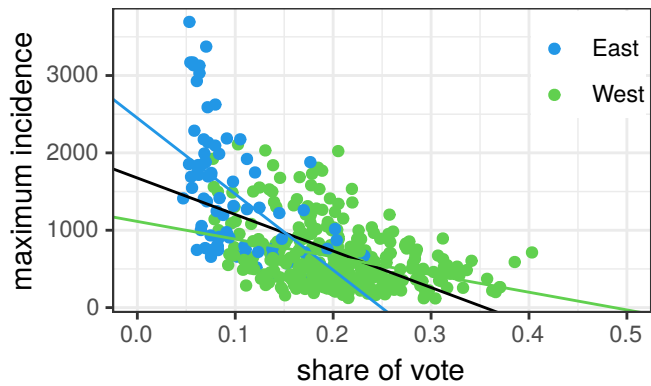

## DIE LINKE

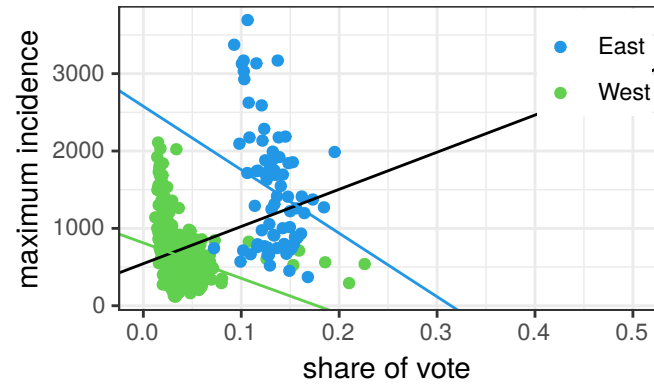

## FDP

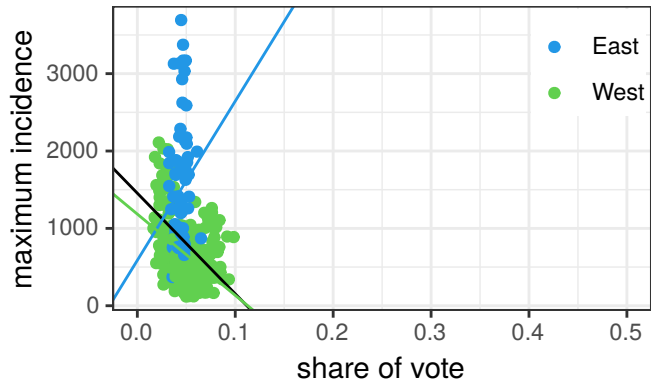

## Other Parties

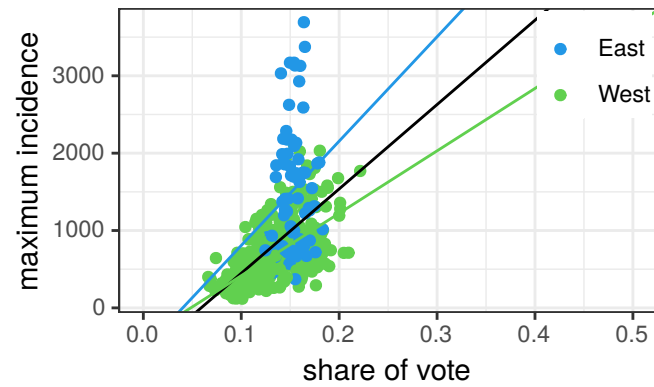

## Voter Participation

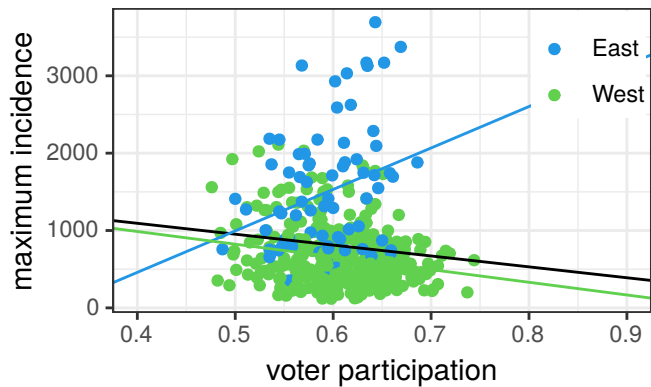

# Max. Incidence (adults) vs share of vote for period [81-100]

## AfD

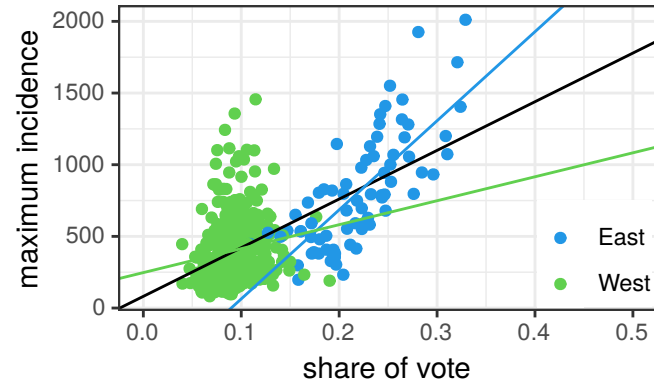

## SPD

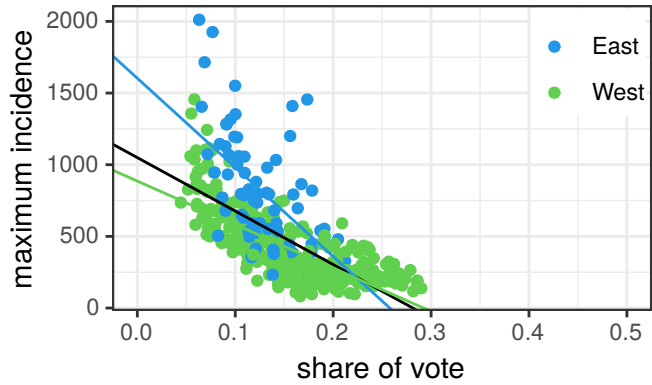

## CDU/CSU

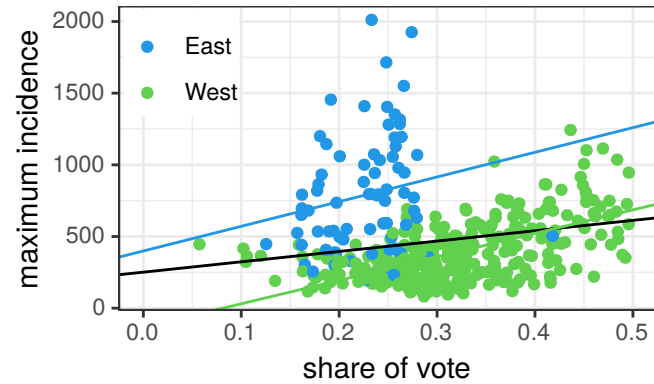

## GRÜNE

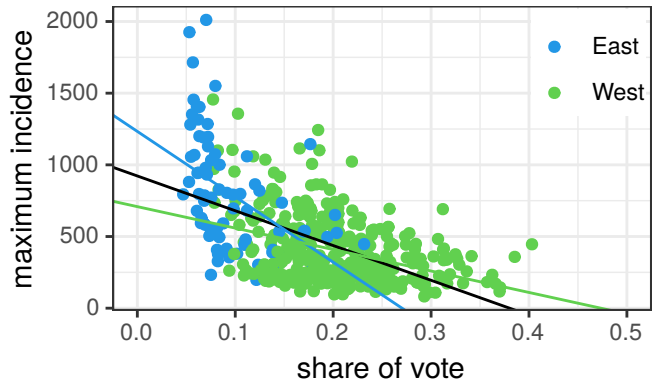

## DIE LINKE

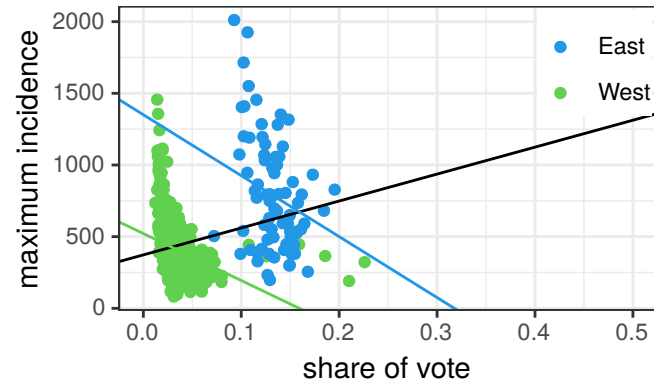

## FDP

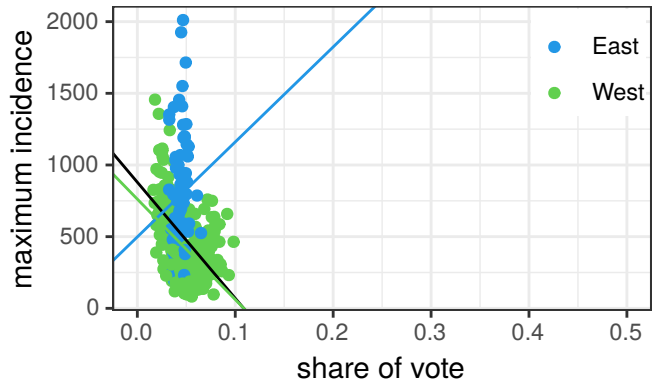

## Other Parties

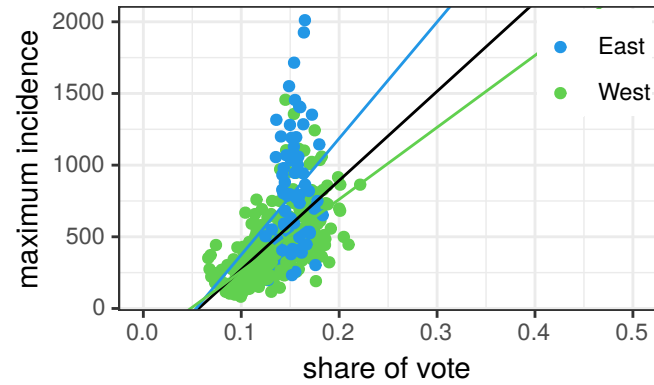

## Voter Participation

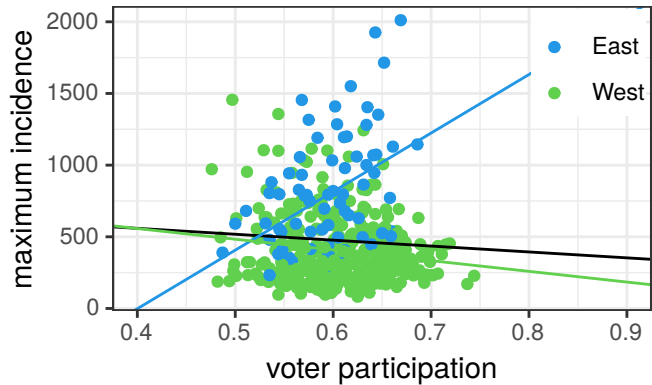

Supplement: Supplementary file [file supplementary]
